# Supplementary material for: Issues Related to the Treatment of H. pylori Infection in People Living with HIV and Receiving Antiretrovirals
Source: MDPI journal article supplement (doi:10.3390/microorganisms10081541), 2022-07-29
Supplement: s1 [file s1]

Table S1. Visual colored-based drug interactions between anti-*Helicobacter pylori* drugs and antiretrovirals.

| Antiretrovirals     | Pantoprazole | Lansoprazole | Esomeprazole | Omeprazole | Rabeprazole | Amoxicillin | Clarithromycin | Bismuth (sous citrate) | Tetracycline | Metronidazole | Ciprofloxacin | Levofloxacin | Rifabutin |
|---------------------|--------------|--------------|--------------|------------|-------------|-------------|----------------|------------------------|--------------|---------------|---------------|--------------|-----------|
| Abacavir            |              |              |              |            |             |             |                |                        |              |               |               |              |           |
| Didanosine          |              |              |              |            |             |             |                |                        |              |               |               |              |           |
| Emtricitabine       |              |              |              |            |             |             |                |                        |              |               |               |              |           |
| Lamivudine          |              |              |              |            |             |             |                |                        |              |               |               |              |           |
| Stavudine           |              |              |              |            |             |             |                |                        |              |               |               |              |           |
| Zidovudine          |              |              |              |            |             |             |                |                        |              |               |               |              |           |
| Tenofovir           |              |              |              |            |             |             |                |                        |              |               |               |              | TDF       |
| Efavirenz           |              |              |              |            |             |             |                |                        |              |               |               |              |           |
| Etravirine          |              |              |              |            |             |             |                |                        |              |               |               |              |           |
| Névirapine          |              |              |              |            |             |             |                |                        |              |               |               |              |           |
| Doravirine          |              |              |              |            |             |             |                |                        |              |               |               |              |           |
| Rilpivirine         |              |              |              |            |             |             |                |                        |              |               |               |              |           |
| Atazanavir          |              |              |              |            |             |             |                |                        |              |               |               |              |           |
| Darunavir           |              |              |              |            |             |             |                |                        |              |               |               |              |           |
| Cobicistat          |              |              |              |            |             |             |                |                        |              |               |               |              |           |
| Fosamprenavir       |              |              |              |            |             |             |                |                        |              |               |               |              |           |
| Ritonavir           |              |              |              |            |             |             |                |                        |              |               |               |              |           |
| Saquinavir          |              |              |              |            |             |             |                |                        |              |               |               |              |           |
| Tipranavir          |              |              |              |            |             |             |                |                        |              |               |               |              |           |
| Lopinavir           |              |              |              |            |             |             |                |                        |              |               |               |              |           |
| Enfuvirtide         |              |              |              |            |             |             |                |                        |              |               |               |              |           |
| Maraviroc           |              |              |              |            |             |             |                |                        |              |               |               |              |           |
| Raltegravir         |              |              |              |            |             |             |                |                        |              |               |               |              |           |
| Dolutegravir        |              |              |              |            |             |             |                |                        |              |               |               |              |           |
| Elvitegravir        |              |              |              |            |             |             |                |                        |              |               |               |              |           |
| Bictegravir         |              |              |              |            |             |             |                |                        |              |               |               |              |           |
| Cabotegravir (oral) |              |              |              |            |             |             |                |                        |              |               |               |              |           |
| Fostemsavir         |              |              |              |            |             |             |                |                        |              |               |               |              |           |
| Delavirdine         |              |              |              |            |             |             |                |                        |              |               |               |              |           |

Color legend

|   |                                                                               |
|---|-------------------------------------------------------------------------------|
|   | Recommended                                                                   |
|   | Not recommended                                                               |
|   | Caution, may be not recommended for <i>H. pylori</i> eradication              |
|   | Not studied, may be recommended                                               |
| ? | Clinical significance is uncertain, Monitor for adverse effects of both drugs |
|   | Bismuth has not been studied, may be recommended                              |
| * | Poten                                                                         |
| ! | Risk of QT interval prolongation, an electrocardiogram is requested           |

TDF Tenofovir disoproxil Furamate

The online version of this table 1 is presented with comments for drug interactions
